# Supplementary material
Source: PubMed Central journal article supplement (PMC3553735)
Supplement: AAC.00950-12_zac999101575so1.pdf [file AAC.00950-12_zac999101575so1.pdf]

| <b>IC (nM)</b>         | <b>Drug</b> | <b>D10<sup>wt</sup></b> | <b>D10<sup>mut</sup></b> | <b>p</b>                 |
|------------------------|-------------|-------------------------|--------------------------|--------------------------|
| <b>IC<sub>20</sub></b> | CQ          | 15.5 (14.4 – 16.7)      | 14.5 (13.5 – 15.6)       | 0.33                     |
|                        | AQ          | 5.7 (4.6 – 7.5)         | 12.5 (12.2 – 12.9)       | 1.47 x 10 <sup>-3</sup>  |
|                        | DEAQ        | 8.3 (7.9 – 8.8)         | 8.6 (7.9 – 9.5)          | 0.61                     |
| <b>IC<sub>50</sub></b> | CQ          | 28.0 (26.3 – 29.7)      | 26.6 (25.4 – 27.9)       | 0.21                     |
|                        | AQ          | 15.1 (13.1 – 17.1)      | 28.7 (26.8 – 30.6)       | 7.97 x 10 <sup>-12</sup> |
|                        | DEAQ        | 15.3 (13.5 – 17.0)      | 20.5 (19.4 -21.5)        | 1.32 x 10 <sup>-5</sup>  |
| <b>IC<sub>90</sub></b> | CQ          | 54.1 (52.4 – 55.7)      | 52.9 (50.9 – 55.0)       | 0.66                     |
|                        | AQ          | 34.6 (33.3 – 35.8)      | 49.9 (49.3 – 50.5)       | 1.15 x 10 <sup>-4</sup>  |
|                        | DEAQ        | 33.5 (32.2 – 34.8)      | 42.2 (40.8 – 43.6)       | 7.22 x 10 <sup>-4</sup>  |

**Table S1.** D10 susceptibilities to CQ, AQ and DEAQ (nM; CI<sub>95%</sub>). P-values (p) for the difference in between the clones were controlled according to the Bonferroni method.

|                             | <b>Start</b>       | <b>Drug removal</b> | <b>End</b>         | <b><i>g</i></b> |
|-----------------------------|--------------------|---------------------|--------------------|-----------------|
| <b>Control</b>              | 48.0 (46.4 – 49.6) | 42.1 (36.9 – 47.2)  | 30.9 (29.9 – 31.9) | 0.89            |
| <b>IC<sub>20</sub> CQ</b>   | 47.3 (45.0 – 49.7) | 31.7 (31.2 – 32.2)  | 39.3 (36.8 – 41.9) | 0.95            |
| <b>IC<sub>20</sub> AQ</b>   | 47.3 (45.0 – 49.7) | 29.7 (29.1 – 30.3)  | 39.5 (38.6 – 40.4) | 0.95            |
| <b>IC<sub>20</sub> DEAQ</b> | 47.3 (45.0 – 49.7) | 34.2 (26.3 – 42.2)  | 39.2 (36.2 – 42.3) | 0.94            |
| <b>IC<sub>50</sub> CQ</b>   | 48.8 (46.6 – 51.0) | 58.1 (56.1 – 60.2)  | 64.2 (56.1 – 72.4) | 1.11            |
| <b>IC<sub>50</sub> AQ</b>   | 48.8 (46.6 – 51.0) | 57.8 (56.7 – 58.9)  | 65.0 (59.2 – 70.7) | 1.12            |
| <b>IC<sub>50</sub> DEAQ</b> | 48.8 (46.6 – 51.0) | 46.0 (44.2 – 47.8)  | 56.3 (50.6 – 62.0) | 1.05            |

**Table S2.** Proportion (%; CI<sub>95%</sub>) of the *pfmdr1* 1246Y allele in mixed cultures under drug free conditions (control) or after exposure to an IC<sub>20</sub> or IC<sub>50</sub> concentration of CQ, AQ or DEAQ. The relative growth (*g*) for the mutated clone as compare with the wild-type clone.

| <b>Recurrent infections</b> | <b>pfmdr1</b> | <b>Day</b> | <b>Day</b> | <b>Day</b>  | <b>Day</b>   | <b>Day</b>   | <b>Day</b>   | <b>Day</b>   | <b>Day</b>  |
|-----------------------------|---------------|------------|------------|-------------|--------------|--------------|--------------|--------------|-------------|
|                             | <b>1246</b>   | <b>0</b>   | <b>1-7</b> | <b>8-14</b> | <b>15-21</b> | <b>22-28</b> | <b>29-35</b> | <b>36-42</b> | <b>1-42</b> |
| <b>AQ</b>                   | <b>D</b>      | <b>17</b>  | <b>1</b>   | <b>2</b>    | <b>3</b>     |              |              |              | <b>6</b>    |
|                             | <b>Y</b>      | <b>11</b>  | <b>1</b>   | <b>10</b>   | <b>4</b>     |              |              |              | <b>15</b>   |
|                             | <b>Total</b>  | <b>28</b>  | <b>2</b>   | <b>12</b>   | <b>7</b>     |              |              |              | <b>21</b>   |
| <b>ASAQ 2002-3</b>          | <b>D</b>      | <b>126</b> | <b>0</b>   | <b>0</b>    | <b>13</b>    | <b>13</b>    | <b>9</b>     | <b>5</b>     | <b>40</b>   |
|                             | <b>Y</b>      | <b>13</b>  | <b>0</b>   | <b>2</b>    | <b>4</b>     | <b>0</b>     | <b>3</b>     | <b>2</b>     | <b>11</b>   |
|                             | <b>Total</b>  | <b>139</b> | <b>0</b>   | <b>2</b>    | <b>17</b>    | <b>13</b>    | <b>12</b>    | <b>7</b>     | <b>51</b>   |
| <b>ASAQ 2005</b>            | <b>D</b>      | <b>132</b> | <b>0</b>   | <b>2</b>    | <b>7</b>     | <b>7</b>     | <b>2</b>     | <b>7</b>     | <b>25</b>   |
|                             | <b>Y</b>      | <b>23</b>  | <b>0</b>   | <b>3</b>    | <b>5</b>     | <b>2</b>     | <b>1</b>     | <b>3</b>     | <b>14</b>   |
|                             | <b>Total</b>  | <b>155</b> | <b>0</b>   | <b>5</b>    | <b>12</b>    | <b>9</b>     | <b>3</b>     | <b>10</b>    | <b>39</b>   |

| <b>Recrudescent infections</b> | <b>pfmdr1</b> | <b>Day</b> | <b>Day</b> | <b>Day</b>  | <b>Day</b>   | <b>Day</b>   | <b>Day</b>   | <b>Day</b>   | <b>Day</b>  |
|--------------------------------|---------------|------------|------------|-------------|--------------|--------------|--------------|--------------|-------------|
|                                | <b>1246</b>   | <b>0</b>   | <b>1-7</b> | <b>8-14</b> | <b>15-21</b> | <b>22-28</b> | <b>29-35</b> | <b>36-42</b> | <b>1-42</b> |
| <b>AQ</b>                      | <b>D</b>      | <b>17</b>  | <b>0</b>   | <b>0</b>    | <b>0</b>     |              |              |              | <b>0</b>    |
|                                | <b>Y</b>      | <b>11</b>  | <b>1</b>   | <b>6</b>    | <b>4</b>     |              |              |              | <b>11</b>   |
|                                | <b>Total</b>  | <b>28</b>  | <b>1</b>   | <b>6</b>    | <b>4</b>     |              |              |              | <b>11</b>   |
| <b>ASAQ 2002-3</b>             | <b>D</b>      | <b>126</b> | <b>0</b>   | <b>0</b>    | <b>4</b>     | <b>0</b>     | <b>2</b>     | <b>0</b>     | <b>6</b>    |
|                                | <b>Y</b>      | <b>13</b>  | <b>0</b>   | <b>0</b>    | <b>1</b>     | <b>0</b>     | <b>0</b>     | <b>0</b>     | <b>1</b>    |
|                                | <b>Total</b>  | <b>139</b> | <b>0</b>   | <b>0</b>    | <b>5</b>     | <b>0</b>     | <b>2</b>     | <b>0</b>     | <b>7</b>    |
| <b>ASAQ 2005</b>               | <b>D</b>      | <b>132</b> | <b>0</b>   | <b>0</b>    | <b>3</b>     | <b>2</b>     | <b>0</b>     | <b>1</b>     | <b>6</b>    |
|                                | <b>Y</b>      | <b>23</b>  | <b>0</b>   | <b>1</b>    | <b>4</b>     | <b>0</b>     | <b>1</b>     | <b>0</b>     | <b>6</b>    |
|                                | <b>Total</b>  | <b>155</b> | <b>0</b>   | <b>1</b>    | <b>7</b>     | <b>2</b>     | <b>1</b>     | <b>1</b>     | <b>12</b>   |

**Table S3.** *Pfmdr1* D1246Y allele distribution (n) in all recurrent infections and in recrudescent infections specifically during follow-up after AQ monotherapy in Kenya 2003

(n=53) or ASAQ combination therapy in Zanzibar 2002 – 2003 (n=198) and 2005 (n=174).

Mixed and unknown genotype results excluded.
